# Supplementary material for: Long intergenic non-coding RNA 00467 promotes lung adenocarcinoma proliferation, migration and invasion by binding with EZH2 and repressing HTRA3 expression
Source: PubMed Central journal article supplement — Mol Med Rep. 2019 May 23;20(1):640–54. doi: 10.3892/mmr.2019.10292 (PMC6580024; doi:10.3892/mmr.2019.10292), 2019-05-23
Supplement: Supplementary_Data.pdf [file Supplementary_Data.pdf]

Table SI. Primers sequences used for reverse transcription quantitative polymerase chain reaction and ChIP primers.

| Human                    | Forward                | Reverse                 |
|--------------------------|------------------------|-------------------------|
| linc00467                | GCGTAGGCCGGACATTTCTA   | CCTGCCATGTTGGAAACTGC    |
| GAPDH                    | GGAGCGAGATCCCTCCAAAAT  | GGCTGTTGTCATACTTCTCATGG |
| SCIN                     | ATGGCTTCGGGAAAGTTTATGT | CATCCACCATATTGTGCTGGG   |
| UAP1                     | CCGCGAGAGGAAGGATGG     | CGTAGTAGGTGCTCTTGCCC    |
| RGMA                     | CCTCAGGACTTTCACCGACC   | CGTTCTTAGAGCCATCCACGAA  |
| MYH7B                    | TTGGCCCCTTTCCTCATCTG   | CGAGACACGATCTTGGCCTT    |
| SHBG                     | GCCCAGGACAAGAGCCTATC   | CCTTAGGGTTGGTATCCCCATAA |
| SPHK1                    | GCTCTGGTGGTCATGTCTGG   | CACAGCAATAGCGTGCAGT     |
| ChIP-Primer <sup>a</sup> | GGGGGGTTCTGCCTTCTC     | TTCCATTCTCATCATTGCTCC   |

ChIP, chromatin immunoprecipitation. <sup>a</sup>The sequences for the ChIP primers for the HTRA3 promoter region.

Table SII. siRNAs sequences of linc00467, EZH2 and HTRA3.

| Human           | Sense                  | Antisense             |
|-----------------|------------------------|-----------------------|
| si-NC           | UUCUCCGAACGUGUCACGUTT  | ACGUGACACGUUCGGAGAATT |
| si-linc00467 1# | GCUGGCAAUAUGAAGGUATT   | UACCUUCAUAUUUGCCAGCTT |
| si-linc00467 2# | GGAAGCCAGACAGAUUCAATT  | UUGAAUCUGUCUGGCUUCCTT |
| si-linc00467 3# | ACACUAAGUUCAGACUCAUTT  | AUGAGUCUGAACUUAGUGUTT |
| si-EZH2         | GACUCUGAAUGCAGUUGCUTT  | AGCAACUGCAUUCAGAGUCTT |
| si-HTRA3        | CCAUCAAAAGACAUCGACAATT | UUGUCGAUGUCUUUGAUGGTT |

siRNA, small interfering RNA; linc, long intergenic noncoding RNA; EZH2, histone-lysine N-methyltransferase EZH2; HTRA3, HtrA serine peptidase 3; NC, negative control.
